# Supplementary material for: Effects of organoamine template and transition metal coordination mode on the self-assembly of reduced polyoxomolybdenum phosphate
Source: Royal Society of Chemistry journal article supplement (doi:10.1039/c1ce05417a), 2011-01-01
Supplement: c1ce05417a.pdf [file c1ce05417a.pdf]

## Supporting information

**Table S1.** Selected bonds distances (Å) for compound **1**

|             |          |             |          |             |          |
|-------------|----------|-------------|----------|-------------|----------|
| Mo(1)-O(16) | 1.672(4) | Mo(4)-O(24) | 2.061(4) | Mn(2)-O(18) | 2.181(4) |
| Mo(1)-O(7)  | 1.937(4) | Mo(4)-O(5)  | 2.123(4) | Mn(2)-O(1W) | 2.224(5) |
| Mo(1)-O(3)  | 1.974(4) | Mo(4)-O(9)  | 2.247(4) | Mn(2)-O(15) | 2.460(4) |
| Mo(1)-O(27) | 2.074(4) | Mo(5)-O(11) | 1.692(4) | P(1)-O(18)  | 1.507(4) |
| Mo(1)-O(5)  | 2.124(4) | Mo(5)-O(12) | 1.938(4) | P(1)-O(13)  | 1.548(4) |
| Mo(1)-O(9)  | 2.293(4) | Mo(5)-O(1)  | 1.973(4) | P(1)-O(6)   | 1.559(4) |
| Mo(2)-O(29) | 1.671(4) | Mo(5)-O(22) | 2.057(4) | P(1)-O(9)   | 1.564(4) |
| Mo(2)-O(10) | 1.938(4) | Mo(5)-O(4)  | 2.127(4) | P(2)-O(31)  | 1.482(4) |
| Mo(2)-O(2)  | 1.974(4) | Mo(5)-O(6)  | 2.237(3) | P(2)-O(27)  | 1.531(4) |
| Mo(2)-O(19) | 2.036(4) | Mo(6)-O(14) | 1.686(4) | P(2)-O(24)  | 1.537(4) |
| Mo(2)-O(4)  | 2.130(4) | Mo(6)-O(7)  | 1.935(4) | P(2)-O(28)  | 1.584(5) |
| Mo(2)-O(6)  | 2.284(3) | Mo(6)-O(3)  | 1.977(4) | P(3)-O(23)  | 1.516(4) |
| Mo(3)-O(26) | 1.683(4) | Mo(6)-O(20) | 2.045(4) | P(3)-O(30)  | 1.541(4) |
| Mo(3)-O(10) | 1.937(4) | Mo(6)-O(8)  | 2.112(4) | P(3)-O(20)  | 1.546(4) |
| Mo(3)-O(2)  | 1.976(4) | Mo(6)-O(13) | 2.298(4) | P(3)-O(25)  | 1.548(4) |
| Mo(3)-O(25) | 2.048(4) | Mn(1)-O(2)  | 2.177(3) | P(4)-O(17)  | 1.495(4) |
| Mo(3)-O(8)  | 2.089(4) | Mn(1)-O(1)  | 2.203(4) | P(4)-O(19)  | 1.542(4) |
| Mo(3)-O(13) | 2.315(4) | Mn(1)-O(3)  | 2.214(4) | P(4)-O(22)  | 1.545(4) |
| Mo(4)-O(21) | 1.682(4) | Mn(2)-O(17) | 2.123(4) | P(4)-O(15)  | 1.580(4) |
| Mo(4)-O(12) | 1.937(4) | Mn(2)-O(31) | 2.144(4) |             |          |
| Mo(4)-O(1)  | 1.972(4) | Mn(2)-O(23) | 2.147(4) |             |          |

**Table S2.** Selected bonds distances (Å) for compound **2**

|             |          |             |          |             |          |
|-------------|----------|-------------|----------|-------------|----------|
| Mo(1)-O(19) | 1.679(3) | Mo(4)-O(3)  | 1.977(3) | Mn(2)-O(24) | 2.069(3) |
| Mo(1)-O(6)  | 1.944(3) | Mo(4)-O(25) | 2.064(3) | Mn(2)-O(13) | 2.140(3) |
| Mo(1)-O(2)  | 1.984(3) | Mo(4)-O(18) | 2.125(3) | Mn(2)-O(1W) | 2.159(4) |
| Mo(1)-O(16) | 2.043(3) | Mo(4)-O(10) | 2.262(3) | Mn(2)-O(8)  | 2.205(3) |
| Mo(1)-O(5)  | 2.110(3) | Mo(5)-O(29) | 1.687(3) | P(1)-O(22)  | 1.522(3) |
| Mo(1)-O(9)  | 2.269(3) | Mo(5)-O(12) | 1.932(3) | P(1)-O(8)   | 1.529(3) |
| Mo(2)-O(20) | 1.684(3) | Mo(5)-O(3)  | 1.971(3) | P(1)-O(16)  | 1.542(3) |
| Mo(2)-O(7)  | 1.934(3) | Mo(5)-O(14) | 2.072(3) | P(1)-O(14)  | 1.551(3) |
| Mo(2)-O(4)  | 1.972(3) | Mo(5)-O(5)  | 2.115(3) | P(2)-O(13)  | 1.501(3) |
| Mo(2)-O(23) | 2.057(3) | Mo(5)-O(9)  | 2.259(3) | P(2)-O(9)   | 1.550(3) |
| Mo(2)-O(11) | 2.111(3) | Mo(6)-O(27) | 1.678(3) | P(2)-O(10)  | 1.551(3) |
| Mo(2)-O(1)  | 2.305(3) | Mo(6)-O(6)  | 1.935(3) | P(2)-O(1)   | 1.553(3) |
| Mo(3)-O(17) | 1.687(3) | Mo(6)-O(2)  | 1.978(3) | P(3)-O(24)  | 1.498(3) |
| Mo(3)-O(7)  | 1.923(3) | Mo(6)-O(15) | 2.098(3) | P(3)-O(21)  | 1.521(3) |

|             |          |             |          |            |          |
|-------------|----------|-------------|----------|------------|----------|
| Mo(3)-O(4)  | 1.973(3) | Mo(6)-O(11) | 2.100(3) | P(3)-O(25) | 1.536(3) |
| Mo(3)-O(21) | 2.031(3) | Mo(6)-O(1)  | 2.267(3) | P(3)-O(26) | 1.573(4) |
| Mo(3)-O(18) | 2.115(3) | Mn(1)-O(4)  | 2.193(3) | P(4)-O(31) | 1.503(3) |
| Mo(3)-O(10) | 2.269(3) | Mn(1)-O(2)  | 2.204(3) | P(4)-O(23) | 1.514(3) |
| Mo(4)-O(28) | 1.673(3) | Mn(1)-O(3)  | 2.222(3) | P(4)-O(15) | 1.552(3) |
| Mo(4)-O(12) | 1.931(3) | Mn(2)-O(22) | 2.050(3) | P(4)-O(30) | 1.578(3) |

**Table S3.** Selected bonds distances (Å) for compound **3**

|             |            |             |            |            |            |
|-------------|------------|-------------|------------|------------|------------|
| Mo(1)-O(14) | 1.6857(18) | Mo(4)-O(3)  | 1.9354(16) | Mn(1)-O(1) | 2.2078(17) |
| Mo(1)-O(13) | 1.9321(17) | Mo(4)-O(1)  | 1.9764(17) | P(1)-O(31) | 1.5060(18) |
| Mo(1)-O(2)  | 1.9794(15) | Mo(4)-O(23) | 2.0454(18) | P(1)-O(23) | 1.5374(19) |
| Mo(1)-O(24) | 2.0255(16) | Mo(4)-O(4)  | 2.1060(17) | P(1)-O(20) | 1.5402(19) |
| Mo(1)-O(6)  | 2.1093(17) | Mo(4)-O(17) | 2.2829(16) | P(1)-O(28) | 1.5658(18) |
| Mo(1)-O(7)  | 2.2576(16) | Mo(5)-O(19) | 1.6821(18) | P(2)-O(10) | 1.5171(16) |
| Mo(2)-O(16) | 1.6775(17) | Mo(5)-O(25) | 1.9371(17) | P(2)-O(7)  | 1.5469(18) |
| Mo(2)-O(3)  | 1.9324(17) | Mo(5)-O(12) | 1.9783(15) | P(2)-O(17) | 1.5472(17) |
| Mo(2)-O(1)  | 1.9760(16) | Mo(5)-O(22) | 2.0261(16) | P(2)-O(8)  | 1.5537(17) |
| Mo(2)-O(11) | 2.0503(17) | Mo(5)-O(6)  | 2.1183(17) | P(3)-O(15) | 1.5118(19) |
| Mo(2)-O(9)  | 2.1113(17) | Mo(5)-O(7)  | 2.2564(17) | P(3)-O(11) | 1.5352(17) |
| Mo(2)-O(8)  | 2.2716(16) | Mo(6)-O(29) | 1.6725(18) | P(3)-O(5)  | 1.5418(19) |
| Mo(3)-O(26) | 1.6813(18) | Mo(6)-O(25) | 1.9350(16) | P(3)-O(21) | 1.5609(19) |
| Mo(3)-O(13) | 1.9537(15) | Mo(6)-O(12) | 1.9703(16) | P(4)-O(27) | 1.5178(17) |
| Mo(3)-O(2)  | 1.9699(17) | Mo(6)-O(5)  | 2.0797(17) | P(4)-O(30) | 1.5226(19) |
| Mo(3)-O(20) | 2.0752(17) | Mo(6)-O(9)  | 2.1243(16) | P(4)-O(24) | 1.5594(18) |
| Mo(3)-O(4)  | 2.0923(16) | Mo(6)-O(8)  | 2.2829(17) | P(4)-O(22) | 1.5605(19) |
| Mo(3)-O(17) | 2.2815(16) | Mn(1)-O(2)  | 2.1820(16) |            |            |
| Mo(4)-O(18) | 1.6794(17) | Mn(1)-O(12) | 2.2039(16) |            |            |

**Table S4.** Selected bonds distances (Å) for compound **4**

|             |          |             |          |             |          |
|-------------|----------|-------------|----------|-------------|----------|
| Mo(1)-O(21) | 1.685(3) | Mo(4)-O(15) | 1.926(3) | Cu(1)-O(2)  | 2.271(3) |
| Mo(1)-O(5)  | 1.940(3) | Mo(4)-O(4)  | 1.950(3) | Cu(2)-O(17) | 1.839(3) |
| Mo(1)-O(1)  | 1.946(3) | Mo(4)-O(12) | 2.062(3) | P(1)-O(17)  | 1.514(4) |
| Mo(1)-O(11) | 2.092(3) | Mo(4)-O(10) | 2.132(3) | P(1)-O(7)   | 1.544(3) |
| Mo(1)-O(6)  | 2.122(3) | Mo(4)-O(8)  | 2.302(3) | P(1)-O(8)   | 1.548(3) |
| Mo(1)-O(3)  | 2.257(3) | Mo(5)-O(31) | 1.677(4) | P(1)-O(3)   | 1.551(3) |
| Mo(2)-O(24) | 1.694(4) | Mo(5)-O(15) | 1.937(3) | P(2)-O(20)  | 1.501(4) |
| Mo(2)-O(5)  | 1.940(3) | Mo(5)-O(4)  | 1.958(3) | P(2)-O(23)  | 1.530(4) |
| Mo(2)-O(1)  | 1.961(3) | Mo(5)-O(23) | 2.079(3) | P(2)-O(18)  | 1.541(4) |
| Mo(2)-O(13) | 2.055(3) | Mo(5)-O(14) | 2.125(3) | P(2)-O(30)  | 1.577(4) |
| Mo(2)-O(10) | 2.111(3) | Mo(5)-O(7)  | 2.279(3) | P(3)-O(19)  | 1.506(4) |
| Mo(2)-O(8)  | 2.277(3) | Mo(6)-O(29) | 1.687(3) | P(3)-O(16)  | 1.521(4) |

|             |          |             |          |            |          |
|-------------|----------|-------------|----------|------------|----------|
| Mo(3)-O(22) | 1.692(3) | Mo(6)-O(9)  | 1.937(3) | P(3)-O(11) | 1.548(3) |
| Mo(3)-O(9)  | 1.934(3) | Mo(6)-O(2)  | 1.959(3) | P(3)-O(28) | 1.563(4) |
| Mo(3)-O(2)  | 1.951(3) | Mo(6)-O(18) | 2.053(3) | P(4)-O(26) | 1.509(4) |
| Mo(3)-O(16) | 2.058(3) | Mo(6)-O(14) | 2.105(3) | P(4)-O(13) | 1.528(4) |
| Mo(3)-O(6)  | 2.100(3) | Mo(6)-O(7)  | 2.275(3) | P(4)-O(12) | 1.534(4) |
| Mo(3)-O(3)  | 2.290(3) | Cu(1)-O(1)  | 2.204(3) | P(4)-O(27) | 1.570(4) |
| Mo(4)-O(25) | 1.692(4) | Cu(1)-O(4)  | 2.243(3) |            |          |

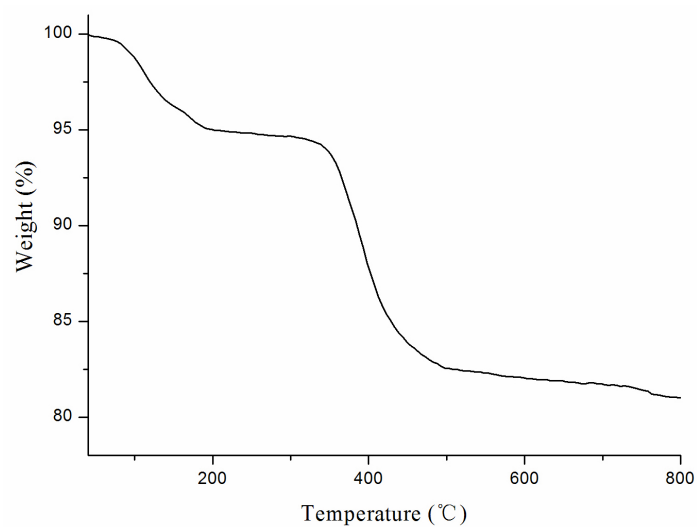

**Fig. S1(a)** Thermogravimetric analysis of compound **1** in flowing N<sub>2</sub> at 10°C/min.

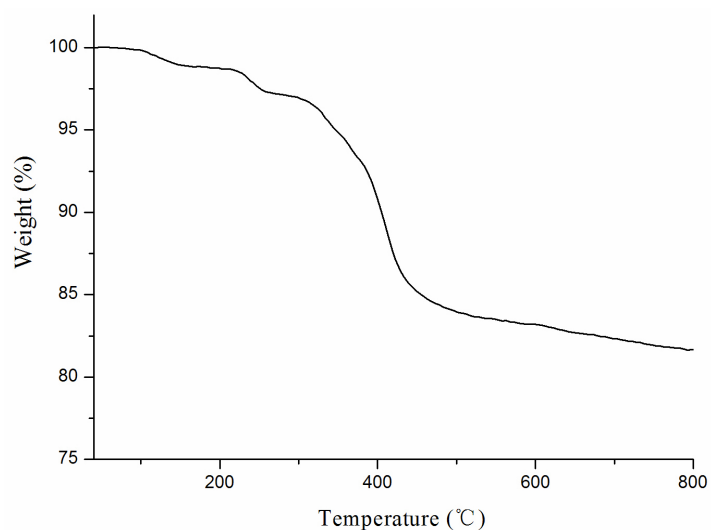

**Fig. S1(b)** Thermogravimetric analysis of compound **2** in flowing N<sub>2</sub> at 10°C/min.

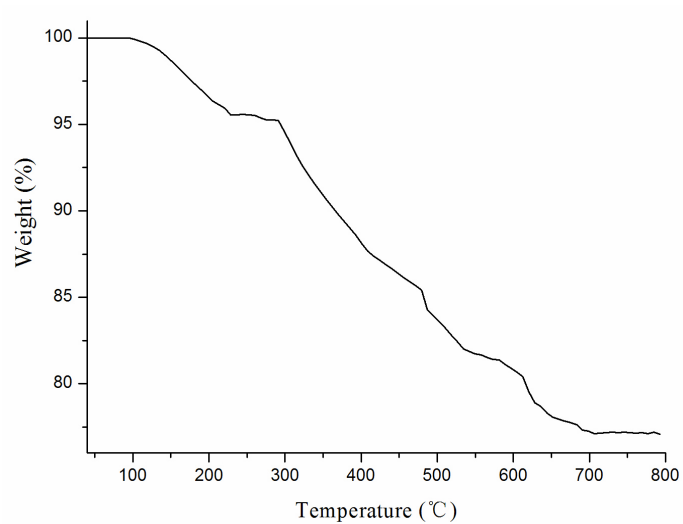

**Fig. S1(c)** Thermogravimetric analysis of compound **3** in flowing N<sub>2</sub> at 10°C/min.

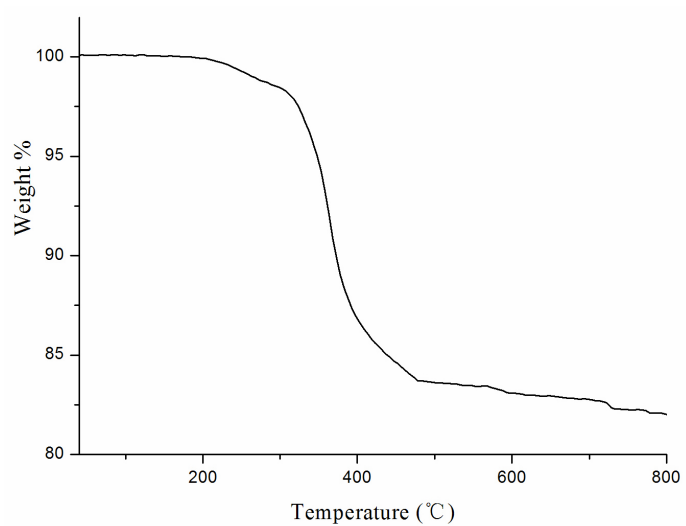

**Fig. S1(d)** Thermogravimetric analysis of compound **4** in flowing N<sub>2</sub> at 10°C/min.

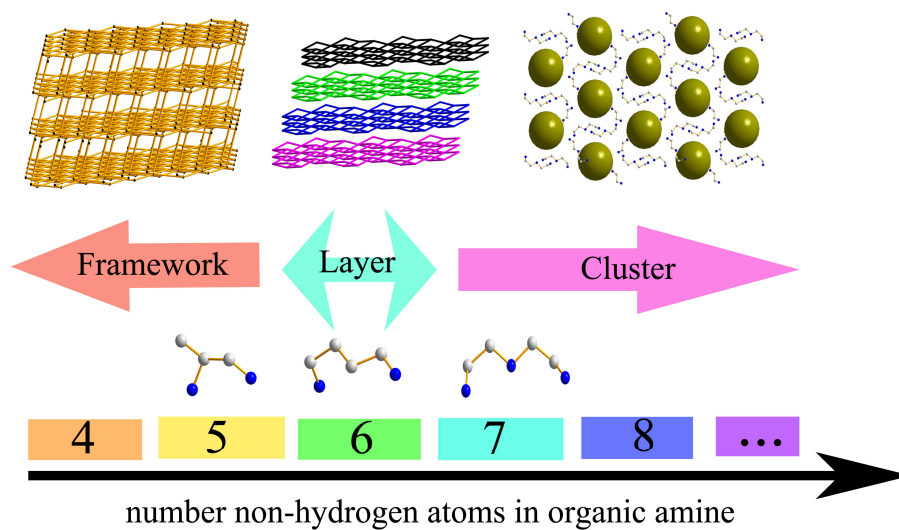

**Fig. S2** Organic amine template effect in reduced manganese molybdenum phosphates.
